# Supplementary material
Source: HighWire-hosted journal article supplement (https://neurologyopen.bmj.com/content/6/1/e000546)
Supplement: inline-supplementary-material-1 [file inline-supplementary-material-1.pdf]

Supplementary table S1. Demographics of patients diagnosed with mtDNA disease at Turku University Hospital in 2010–2022. Patients  $\geq 18$  years of age in 2022 are shown. Patients from outside of Southwest Finland are shaded.

| Patient | Year | mtDNA mutation | Tissue tested | Syndrome/disorder                      | Sex | Approximate age at diagnosis (y) | Family history | Specialty service diagnosing |
|---------|------|----------------|---------------|----------------------------------------|-----|----------------------------------|----------------|------------------------------|
| 1†      | 2010 | m.11778G>A     | B             | LHON                                   | M   | 60-70                            | Y              | Opht                         |
| 2       | 2011 | m.3243A>G      | Mu            | MIDD                                   | M   | 10-20                            | Y              | Gen                          |
| 3†      | 2011 | m.3243A>G      | Mu            | MELAS                                  | F   | 50-60                            | Y              | Gen                          |
| 4       | 2011 | m.4296G>A      | Mu            | Parkinsonism, endocrinopathy, epilepsy | M   | 10-20                            | N              | Neuro                        |
| 5       | 2012 | m.3260A>G      | Mu            | DM, epilepsy, MM                       | F   | 50-60                            | N              | Neuro                        |
| 6       | 2012 | m.3260A>G      | Mu            | PEO                                    | F   | 70-80                            | Y              | Gen                          |
| 7       | 2013 | m.3243A>G      | Mu            | MM                                     | F   | 60-70                            | Y              | Neuro                        |
| 8       | 2013 | m.3243A>G      | Mu            | MELAS                                  | M   | 40-50                            | N              | Research                     |
| 9†      | 2013 | m.3243A>G      | Mu            | MELAS                                  | F   | 60-70                            | N              | Research                     |
| 10      | 2013 | m.7510T>C      | Mu            | SNHL                                   | F   | 10-20                            | Y              | Neuro                        |
| 11      | 2013 | m.7510T>C      | Mu            | SNHL                                   | M   | 20-30                            | Y              | Neuro                        |
| 12      | 2013 | m.7510T>C      | Mu            | SNHL                                   | F   | 40-50                            | Y              | Neuro                        |
| 13      | 2016 | m.3243A>G      | Mu            | SNHL                                   | F   | 30-40                            | Y              | Gen                          |
| 14      | 2016 | m.3243A>G      | Mu            | MM                                     | F   | 50-60                            | Y              | Opht                         |
| 15      | 2016 | m.8344A>G      | Mu            | SNHL                                   | F   | 50-60                            | Y              | Gen                          |
| 16      | 2016 | m.11778G>A     | B             | LHON                                   | M   | 40-50                            | N              | Opht                         |

|            |      |                |    |       |   |       |   |       |
|------------|------|----------------|----|-------|---|-------|---|-------|
| <b>17</b>  | 2016 | m.11778G>A     | B  | LHON  | M | 50-60 | N | Opht  |
| <b>18</b>  | 2017 | mtDNA deletion | Mu | PEO   | M | 60-70 | N | Neuro |
| <b>19</b>  | 2017 | mtDNA deletion | Mu | MM    | F | 60-70 | N | Neuro |
| <b>20</b>  | 2018 | m.3243A>G      | B  | MIDD  | F | 20-30 | Y | Neuro |
| <b>21†</b> | 2018 | m.3271T>C      | Mu | MELAS | F | 60-70 | N | Neuro |
| <b>22</b>  | 2018 | m.4640C>A      | B  | LHON  | M | 30-40 | N | Opht  |
| <b>23</b>  | 2018 | m.11778G>A     | B  | LHON  | M | 40-50 | N | Opht  |
| <b>24</b>  | 2019 | m.3243A>G      | B  | MIDD  | M | 40-50 | Y | Endo  |
| <b>25</b>  | 2019 | m.3243A>G      | Mu | MM    | F | 50-60 | Y | Opht  |
| <b>26</b>  | 2019 | m.3243A>G      | B  | MIDD  | M | 40-50 | Y | Endo  |
| <b>27</b>  | 2019 | m.3243A>G      | B  | SNHL  | F | 70-80 | Y | Gen   |
| <b>28†</b> | 2019 | m.13513G>A     | Mu | MELAS | M | 60-70 | N | Neuro |
| <b>29</b>  | 2020 | m.3243A>G      | B  | MIDD  | F | 50-60 | Y | Endo  |
| <b>30</b>  | 2020 | m.3243A>G      | B  | MM    | F | 50-60 | Y | Gen   |
| <b>31</b>  | 2020 | m.3243A>G      | Mu | PEO   | F | 60-70 | N | Opht  |
| <b>32</b>  | 2020 | mtDNA deletion | Mu | PEO   | M | 30-40 | N | Neuro |
| <b>33</b>  | 2021 | m.3243A>G      | Mu | MELAS | F | 50-60 | N | Card  |
| <b>34</b>  | 2021 | m.3243A>G      | B  | MIDD  | M | 20-30 | Y | Endo  |
| <b>35</b>  | 2021 | m.3243A>G      | B  | MIDD  | M | 20-30 | Y | Endo  |
| <b>36</b>  | 2021 | m.3243A>G      | B  | MM    | M | 20-30 | Y | Gen   |

|    |      |            |    |       |   |       |   |       |
|----|------|------------|----|-------|---|-------|---|-------|
| 37 | 2021 | m.3243A>G  | B  | SNHL  | F | 50-60 | Y | Gen   |
| 38 | 2021 | m.3243A>G  | B  | MELAS | F | 50-60 | N | Neuro |
| 39 | 2021 | m.8344A>G  | Mu | MERRF | F | 50-60 | N | Neuro |
| 40 | 2021 | m.11778G>A | B  | LHON  | F | 30-40 | Y | Opht  |
| 41 | 2021 | m.11778G>A | B  | LHON  | M | 80-90 | Y | Opht  |
| 42 | 2022 | m.3243A>G  | B  | MIDD  | M | 20-30 | Y | Gen   |

B = blood. Card = cardiology. DM = diabetes mellitus. Gen = clinical genetics. Endo = endocrinology. F = female. Family history = family history suggestive of mitochondrial disease. LHON = Leber's hereditary optic neuropathy. LS = Leigh syndrome. M = male. MELAS = mitochondrial encephalomyopathy with lactic acidosis and stroke-like episodes. MERRF = myoclonic epilepsy with ragged red fibres. MIDD = maternally inherited diabetes and deafness. MM = mitochondrial myopathy. Mu = muscle. N = no. Neuro = neurology. Opht = ophthalmology. PEO = progressive external ophthalmoplegia. Research = patient diagnosed in a research project. Y = yes. † = deceased. SNHL = sensorineural hearing loss.
