# Supplementary material
Source: HighWire-hosted journal article supplement (https://neurologyopen.bmj.com/content/6/1/e000546)
Supplement: inline-supplementary-material-2 [file inline-supplementary-material-2.pdf]

Supplementary table S2. Prevalence of mtDNA disease per 100,000 population in North East England (Gorman et al., Ann Neurol 2015; 77: 753-9), in Southwest Finland (present data), and in New Zealand (Missen et al., Intern Med J 2023; ahead of print).

| <b>Pathogenic variant / phenotype</b> | <b>North East England</b> | <b>Southwest Finland</b> | <b>New Zealand</b> |
|---------------------------------------|---------------------------|--------------------------|--------------------|
| m.3243A>G                             | 3.5                       | 4.2                      | 1.8                |
| LHON                                  | 3.7                       | 2.2                      | 0.3                |
| large mtDNA deletion                  | 1.5                       | 1.3                      | 0.3                |
| all adult mtDNA disease               | 9.6                       | 9.2                      | 2.8                |

LHON = Leber's hereditary optic neuropathy.
